# Supplementary material for: Silicon isotopes in juvenile and mature Cyperus papyrus from the Okavango Delta, Botswana
Source: Copernicus journal article supplement (doi:10.5194/egusphere-2024-225), 2024-02-26
Supplement: Supplementary file 1 [file egusphere-2024-225-supplement.pdf]

| Sample ID  | Age      | part_of_the_plant | Sampling date | Sampling site | Sampling location | TN (%) | TOC (%) | SiO2 (µM) | SiO2 (%) | STDEV SiO2 | PO4 (µM) | PO4 (%)  | d30Si (%) | STDEV d30Si | d29Si (%) | STDEV d29Si |
|------------|----------|-------------------|---------------|---------------|-------------------|--------|---------|-----------|----------|------------|----------|----------|-----------|-------------|-----------|-------------|
| 827_1      | Juvenile | Umbel             | May-June 2017 | Sepopa        | Backswamp         | 1,93   | 44,23   | 16,443    | 1,23     | 0,011      | 803,368  | 0,244404 | 0,707388  | 0,18631196  | 0,423057  | 0,09126277  |
| 827_1dup   | Juvenile | Umbel             | May-June 2017 | Sepopa        | Backswamp         |        |         | 16,659    | 1,24     |            | 819,316  |          | 0,970873  |             | 0,552122  |             |
| 827_2      | Juvenile | Umbel             | May-June 2017 | Sepopa        | Backswamp         |        |         | 17,687    | 1,32     | 0,008      |          |          |           |             |           |             |
| 827_2dup   | Juvenile | Umbel             | May-June 2017 | Sepopa        | Backswamp         |        |         | 17,543    | 1,31     |            |          |          |           |             |           |             |
| 828_1      | Juvenile | Culm              | May-June 2017 | Sepopa        | Backswamp         | 0,9    | 41,39   | 15,197    | 1,26     | 0,024      | 372,4749 | 0,117363 | 1,069507  | 0,03664478  | 0,613183  | 0,082757886 |
| 828_1dup   | Juvenile | Culm              | May-June 2017 | Sepopa        | Backswamp         |        |         | 14,79     | 1,22     |            | 394,5316 |          | 1,017684  |             | 0,730220  |             |
| 828_2      | Juvenile | Culm              | May-June 2017 | Sepopa        | Backswamp         |        |         | 15,529    | 1,28     | 0,001      |          |          |           |             |           |             |
| 828_2dup   | Juvenile | Culm              | May-June 2017 | Sepopa        | Backswamp         |        |         | 15,511    | 1,28     |            |          |          |           |             |           |             |
| 815_1      | Juvenile | Scales            | May-June 2017 | Sepopa        | Backswamp         | 0,73   | 41,24   | 15,271    | 1,2      | 0,002      | 240,6352 | 0,076302 | 1,013344  | 0,03206242  | 0,458751  | 0,006487989 |
| 815_1dup   | Juvenile | Scales            | May-June 2017 | Sepopa        | Backswamp         |        |         | 15,234    | 1,2      |            | 252,6066 |          | 0,968001  |             | 0,449576  |             |
| 815_2      | Juvenile | Scales            | May-June 2017 | Sepopa        | Backswamp         |        |         | 15,806    | 1,25     | 0,021      |          |          |           |             |           |             |
| 815_2dup   | Juvenile | Scales            | May-June 2017 | Sepopa        | Backswamp         |        |         | 15,437    | 1,22     |            |          |          |           |             |           |             |
| 811_1      | Juvenile | Rhizome           | May-June 2017 | Sepopa        | Backswamp         | 1,41   | 42,59   | 13,522    | 1,08     | 0,001      | 597,5957 | 0,18403  | 0,610949  | 0,03841986  | 0,297453  | 0,002945537 |
| 811_1dup   | Juvenile | Rhizome           | May-June 2017 | Sepopa        | Backswamp         |        |         | 13,504    | 1,08     |            | 594,4128 |          | 0,665283  |             | 0,293288  |             |
| 811_2      | Juvenile | Rhizome           | May-June 2017 | Sepopa        | Backswamp         |        |         | 14,496    | 1,16     | 0,015      |          |          |           |             |           |             |
| 811_2dup   | Juvenile | Rhizome           | May-June 2017 | Sepopa        | Backswamp         |        |         | 14,225    | 1,14     |            |          |          |           |             |           |             |
| 786i_1     | Mature   | Umbel             | May-June 2017 | Sepopa        | Backswamp         | 1,56   | 46,57   | 28,258    | 2,08     | 0,017      | 361,9154 | 0,108418 | 1,507819  | 0,202040401 | 0,799044  | 0,111871195 |
| 786i_1dup  | Mature   | Umbel             | May-June 2017 | Sepopa        | Backswamp         |        |         | 27,927    | 2,06     |            | 342,433  |          | 1,793547  |             | 0,957254  |             |
| 786i_2     | Mature   | Umbel             | May-June 2017 | Sepopa        | Backswamp         |        |         | 27,725    | 2,04     | 0,043      |          |          |           |             |           |             |
| 786i_2dup  | Mature   | Umbel             | May-June 2017 | Sepopa        | Backswamp         |        |         | 28,552    | 2,1      |            |          |          |           |             |           |             |
| 801i_1     | Mature   | Culm              | May-June 2017 | Sepopa        | Backswamp         | 0,41   | 41,94   | 32,292    | 2,81     | 0,04       | 119,4503 | 0,034803 | 0,715414  | 0,040594412 | 0,394327  | 0,157970385 |
| 801i_1dup  | Mature   | Culm              | May-June 2017 | Sepopa        | Backswamp         |        |         | 32,941    | 2,87     |            | 111,1432 |          | 0,772823  |             | 0,617731  |             |
| 801i_2     | Mature   | Culm              | May-June 2017 | Sepopa        | Backswamp         |        |         | 32,761    | 2,85     | 0,065      |          |          |           |             |           |             |
| 801i_2dup  | Mature   | Culm              | May-June 2017 | Sepopa        | Backswamp         |        |         | 33,825    | 2,95     |            |          |          |           |             |           |             |
| 788_1      | Mature   | Scales            | May-June 2017 | Sepopa        | Backswamp         | 0,49   | 43,46   | 14,755    | 1,24     | 0,002      | 53,11463 | 0,014926 | -0,26768  | 0,129722419 | -0,10866  | 0,111174402 |
| 788_1dup   | Mature   | Scales            | May-June 2017 | Sepopa        | Backswamp         |        |         | 14,718    | 1,23     |            | 45,97556 |          | -0,08423  |             | 0,048566  |             |
| 788_2      | Mature   | Scales            | May-June 2017 | Sepopa        | Backswamp         |        |         | 16,361    | 1,37     | 0,015      |          |          |           |             |           |             |
| 788_2dup   | Mature   | Scales            | May-June 2017 | Sepopa        | Backswamp         |        |         | 16,1      | 1,35     |            |          |          |           |             |           |             |
| 795_1      | Mature   | Rhizome           | May-June 2017 | Sepopa        | Backswamp         | 1,31   | 44,23   | 10,745    | 0,87     | 0          | 227,8334 | 0,068967 | -1,23542  | 0,135954266 | -0,5188   | 0,02245197  |
| 795_1dup   | Mature   | Rhizome           | May-June 2017 | Sepopa        | Backswamp         |        |         | 10,745    | 0,87     |            | 242,0415 |          | -1,04315  |             | -0,55056  |             |
| 795_2      | Mature   | Rhizome           | May-June 2017 | Sepopa        | Backswamp         |        |         | 10,926    | 0,89     | 0,001      |          |          |           |             |           |             |
| 795_2dup   | Mature   | Rhizome           | May-June 2017 | Sepopa        | Backswamp         |        |         | 10,908    | 0,89     |            |          |          |           |             |           |             |
| 794ii_1    | All ages | Roots             | May-June 2017 | Sepopa        | Backswamp         | 1,36   | 35,98   | 82,821    | 6,61     | 0,005      | 230,926  | 0,072933 | 0,014199  | 0,018647545 | -0,02375  | 0,038488371 |
| 794ii_1dup | All ages | Roots             | May-June 2017 | Sepopa        | Backswamp         |        |         | 82,729    | 6,61     |            | 241,947  |          | -0,01217  |             | 0,030685  |             |
| 817_1      | All ages | Roots             | May-June 2017 | Sepopa        | Backswamp         | 1,05   | 40,59   | 45,076    | 3,77     | 0,042      | 227,1092 | 0,069622 | -0,10106  | 0,061003451 | 0,141046  | 0,054422555 |
| 817_1dup   | All ages | Roots             | May-June 2017 | Sepopa        | Backswamp         |        |         | 44,373    | 3,72     |            | 226,0949 |          | -0,01478  |             | 0,064081  |             |
| 817_2      | All ages | Roots             | May-June 2017 | Sepopa        | Backswamp         |        |         | 47,492    | 3,98     | 0,05       |          |          |           |             |           |             |
| 817_2dup   | All ages | Roots             | May-June 2017 | Sepopa        | Backswamp         |        |         | 48,34     | 4,05     |            |          |          |           |             |           |             |
